# Supplementary material for: Mitochondrial‐Targeting Antioxidant SS‐31 Suppresses Airway Inflammation and Oxidative Stress Induced by Cigarette Smoke
Source: Hindawi journal article supplement (doi:10.1155/2021/6644238), 2021-01-01
Supplement: f1 [file 6644238.f1.zip]

**Supplementary Table 1. All western blot images with densitometry**

**Figure 6 a) Sample 1**

**OPA1**

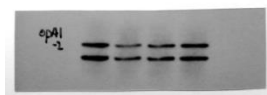

**MFF**

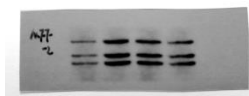

**GAPDH**

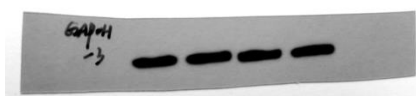

**Sample 1**

|            | CON     | CS      | SS-31(L)+CS | SS-31(H)+CS |
|------------|---------|---------|-------------|-------------|
| OPA1       | 3523945 | 1693173 | 2326862     | 3051777     |
| MFF        | 1670655 | 4302425 | 3851568     | 3122669     |
| GAPDH      | 3104000 | 3149853 | 3008289     | 2983503     |
| OPA1/GAPDH | 1.135   | 0.538   | 0.773       | 1.023       |
| MFF/GAPDH  | 0.538   | 1.366   | 1.280       | 1.047       |

**Sample 2**

**OPA1**

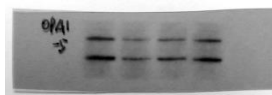

**MFF**

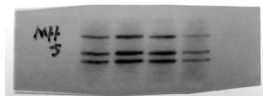

**GAPDH**

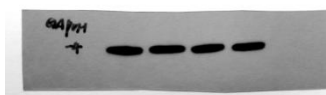

**Sample 2**

|            | CON     | CS      | SS-31(L)+CS | SS-31(H)+CS |
|------------|---------|---------|-------------|-------------|
| OPA1       | 2134142 | 830241  | 1305763     | 1930246     |
| MFF        | 3008866 | 4494431 | 3746897     | 1562962     |
| GAPDH      | 2558558 | 2993834 | 2860858     | 3011834     |
| OPA1/GAPDH | 0.834   | 0.277   | 0.456       | 0.641       |
| MFF/GAPDH  | 1.176   | 1.501   | 1.310       | 0.519       |

**Sample 3**

**OPA1**

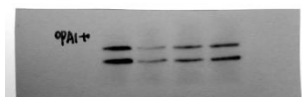

**MFF**

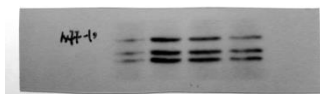

**GAPDH**

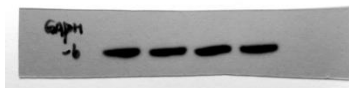

**Sample 3**

|            | CON     | CS      | SS-31(L)+CS | SS-31(H)+CS |
|------------|---------|---------|-------------|-------------|
| OPA1       | 3549360 | 823512  | 1736434     | 2472032     |
| MFF        | 1213271 | 4356659 | 3843423     | 2669702     |
| GAPDH      | 2299195 | 2439821 | 2541556     | 2484954     |
| OPA1/GAPDH | 1.544   | 0.338   | 0.683       | 0.995       |
| MFF/GAPDH  | 0.528   | 1.786   | 1.512       | 1.074       |

### Sample 1

**Figure 6 c)** Cyt(cytosol)

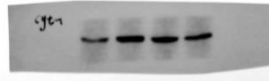

GAPDH

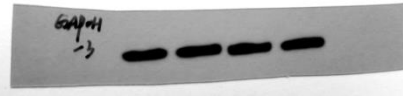

**Figure 6 c)**

Cyt(mit)

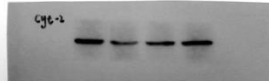

COXIV

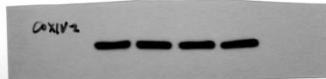

### Sample 1

|                    | CON     | CS      | SS-31(L)+CS | SS-31(H)+CS |
|--------------------|---------|---------|-------------|-------------|
| Cyt(cytosol)       | 895711  | 1871451 | 1591284     | 1355533     |
| GAPDH              | 3104000 | 3149853 | 3008289     | 2983503     |
| Cyt(cytosol)/GAPDH | 0.289   | 0.594   | 0.529       | 0.454       |
| Cyt(mit)           | 2218775 | 1076273 | 1679449     | 2095660     |
| COXIV              | 2521777 | 2552699 | 2572021     | 2699134     |
| Cyt(mit)/COXIV     | 0.880   | 0.422   | 0.653       | 0.776       |

### Sample 2

Cyt(cytosol)

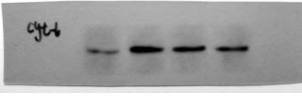

**Figure 6 c)** GAPDH

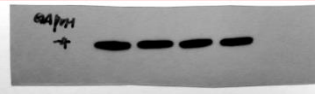

Cyt(mit)

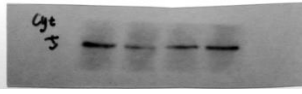

COXIV

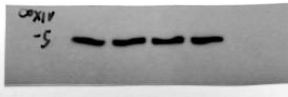

### Sample 2

|                    | CON     | CS      | SS-31(L)+CS | SS-31(H)+CS |
|--------------------|---------|---------|-------------|-------------|
| Cyt(cytosol)       | 645515  | 1880270 | 1572932     | 1232011     |
| GAPDH              | 2558558 | 2993834 | 2860858     | 3011834     |
| Cyt(cytosol)/GAPDH | 0.252   | 0.628   | 0.550       | 0.409       |
| Cyt(mit)           | 1211147 | 370901  | 638844      | 1003984     |
| COXIV              | 2137871 | 2203359 | 2099545     | 2061495     |
| Cyt(mit)/COXIV     | 0.567   | 0.168   | 0.304       | 0.487       |

### Sample 3

Cyt(cytosol)

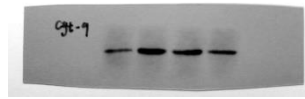

GAPDH

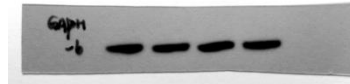

Cyt(mit)

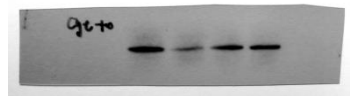

COXIV

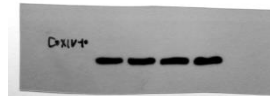

### Sample 3

|                    | CON     | CS      | SS-31(L)+CS | SS-31(H)+CS |
|--------------------|---------|---------|-------------|-------------|
| Cyt(cytosol)       | 833344  | 1913228 | 1791164     | 1242140     |
| GAPDH              | 2299195 | 2439821 | 2541556     | 2484954     |
| Cyt(cytosol)/GAPDH | 0.362   | 0.784   | 0.705       | 0.500       |
| Cyt(mit)           | 2145813 | 622386  | 1443947     | 1546377     |
| COXIV              | 2455719 | 2580462 | 2763621     | 2780949     |
| Cyt(mit)/COXIV     | 0.874   | 0.241   | 0.522       | 0.556       |

### Sample 1

**Figure 8 a)**

P-ERK

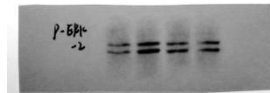

ERK

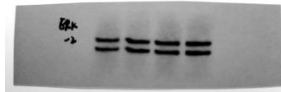

P-P38

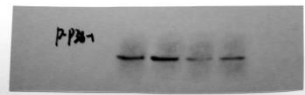

P38

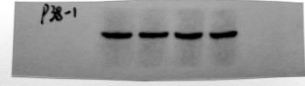

### Sample 1

|           | CON     | CS      | SS-31(L)+CS | SS-31(H)+CS |
|-----------|---------|---------|-------------|-------------|
| P-ERK     | 981306  | 2238003 | 1656092     | 1520395     |
| ERK       | 2823049 | 3287956 | 3377976     | 3673276     |
| P-ERK/ERK | 0.348   | 0.681   | 0.490       | 0.414       |
| P-P38     | 1069147 | 1544211 | 322272      | 590655      |
| P38       | 2280716 | 2180264 | 2206065     | 2139871     |
| P-P38/P38 | 0.469   | 0.708   | 0.146       | 0.276       |

### Sample 2

P-ERK

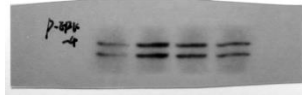

ERK

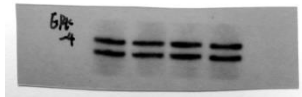

P-P38

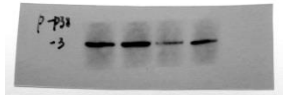

Figure 8 a)

P38

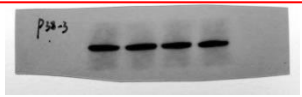

### Sample 2

|           | CON     | CS      | SS-31(L)+CS | SS-31(H)+CS |
|-----------|---------|---------|-------------|-------------|
| P-ERK     | 951137  | 2804141 | 2135193     | 1600622     |
| ERK       | 3481955 | 3273442 | 3635017     | 3848279     |
| P-ERK/ERK | 0.273   | 0.857   | 0.587       | 0.416       |
| P-P38     | 1583949 | 1995573 | 647528      | 1193090     |
| P38       | 2431833 | 2507356 | 2365148     | 2332376     |
| P-P38/P38 | 0.651   | 0.796   | 0.274       | 0.512       |

### Sample 3

P-ERK

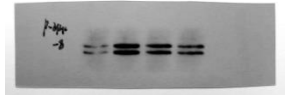

ERK

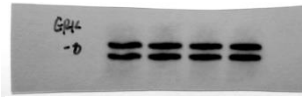

P-P38

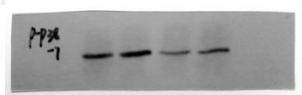

P38

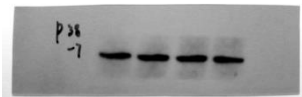

### Sample 3

|           | CON     | CS      | SS-31(L)+CS | SS-31(H)+CS |
|-----------|---------|---------|-------------|-------------|
| P-ERK     | 810021  | 2141710 | 2032237     | 1853349     |
| ERK       | 3364205 | 3092426 | 3009509     | 2800459     |
| P-ERK/ERK | 0.241   | 0.693   | 0.675       | 0.662       |
| P-P38     | 1384150 | 1988653 | 689239      | 1021605     |
| P38       | 2098943 | 2180177 | 2098699     | 2025590     |
| P-P38/P38 | 0.659   | 0.912   | 0.328       | 0.504       |

Sample 1

P-P38

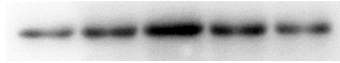

P38

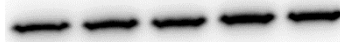

Sample 1

|           | CON    | CSE    | ani+CSE | ani+SS-31+CSE | SS-31+CSE |
|-----------|--------|--------|---------|---------------|-----------|
| P-P38     | 132939 | 226080 | 355197  | 275667        | 196279    |
| P38       | 248806 | 265576 | 260045  | 289179        | 265361    |
| P-P38/P38 | 0.534  | 0.851  | 1.366   | 0.953         | 0.740     |

Figure 9 b)

Sample 2

P-P38

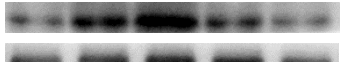

P38

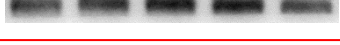

Sample 2

|           | CON    | CSE    | ani+CSE | ani+SS-31+CSE | SS-31+CSE |
|-----------|--------|--------|---------|---------------|-----------|
| P-P38     | 196734 | 321413 | 405276  | 259375        | 184133    |
| P38       | 259538 | 282502 | 318757  | 315403        | 230865    |
| P-P38/P38 | 0.758  | 1.138  | 1.271   | 0.822         | 0.798     |

Sample 3

P-P38

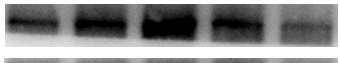

P38

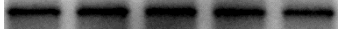

Sample 3

|           | CON    | CSE    | ani+CSE | ani+SS-31+CSE | SS-31+CSE |
|-----------|--------|--------|---------|---------------|-----------|
| P-P38     | 231843 | 292806 | 364752  | 296227        | 200600    |
| P38       | 298335 | 278072 | 317362  | 292265        | 239817    |
| P-P38/P38 | 0.777  | 1.053  | 1.149   | 1.014         | 0.836     |

**Figure 11 a) Sample 1**

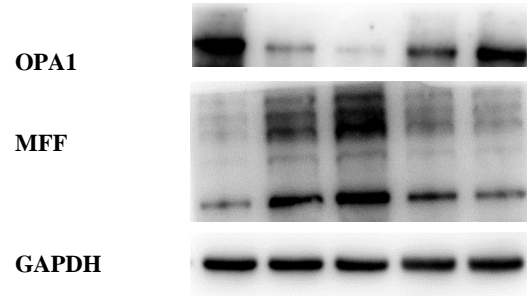

**Sample 1**

|            | CON    | CSE    | ani+CSE | ani+SS-31+CSE | SS-31+CSE |
|------------|--------|--------|---------|---------------|-----------|
| OPA1       | 389430 | 77540  | 32619   | 210804        | 311789    |
| MFF        | 179762 | 672237 | 1005168 | 433782        | 294981    |
| GAPDH      | 344342 | 358677 | 331555  | 323634        | 346481    |
| OPA1/GAPDH | 1.131  | 0.216  | 0.098   | 0.651         | 0.900     |
| MFF/GAPDH  | 0.522  | 1.874  | 3.032   | 1.340         | 0.851     |

**Sample 2**

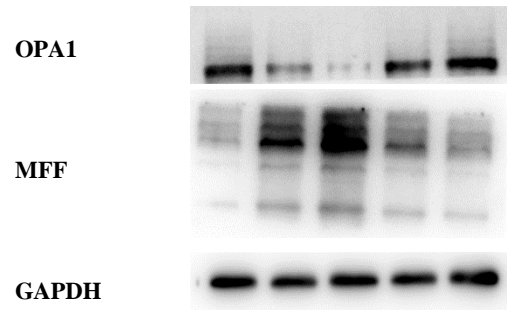

**Sample 2**

|            | CON    | CSE    | ani+CSE | ani+SS-31+CSE | SS-31+CSE |
|------------|--------|--------|---------|---------------|-----------|
| OPA1       | 393739 | 147048 | 54211   | 264023        | 398435    |
| MFF        | 196150 | 696592 | 994968  | 403667        | 281289    |
| GAPDH      | 340292 | 301032 | 346786  | 294935        | 370611    |
| OPA1/GAPDH | 1.157  | 0.488  | 0.156   | 0.895         | 1.075     |
| MFF/GAPDH  | 0.576  | 2.314  | 2.869   | 1.369         | 0.759     |

**Sample 3**

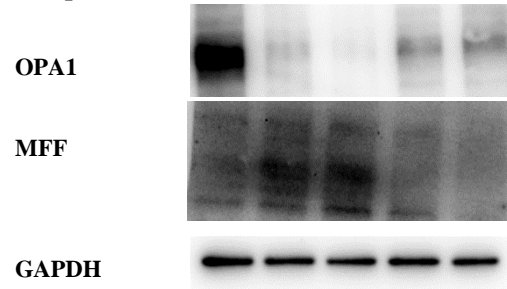

**Sample 3**

|            | CON    | CSE    | ani+CSE | ani+SS-31+CSE | SS-31+CSE |
|------------|--------|--------|---------|---------------|-----------|
| OPA1       | 683186 | 80710  | 25419   | 201966        | 210487    |
| MFF        | 233370 | 391827 | 408495  | 260171        | 199566    |
| GAPDH      | 335563 | 276272 | 260049  | 289540        | 248721    |
| OPA1/GAPDH | 2.036  | 0.292  | 0.098   | 0.698         | 0.846     |
| MFF/GAPDH  | 0.695  | 1.418  | 1.571   | 0.899         | 0.802     |
