# Supplementary material for: Mitochondrial‐Targeting Antioxidant SS‐31 Suppresses Airway Inflammation and Oxidative Stress Induced by Cigarette Smoke
Source: Hindawi journal article supplement (doi:10.1155/2021/6644238), 2021-01-01
Supplement: f1 [file 6644238.f1.zip]

Supplementary Table 2. The top 10 up- and down-DEGs

| Up DEGs       | Down DEGs |
|---------------|-----------|
| Dbp           | Has1      |
| Nr1d2         | Cd5l      |
| E030044B06Rik | Arntl     |
| Per3          | Adamts4   |
| Cxcr6         | Fam107a   |
| Nr1d1         | Spon2     |
| Plk5          | Cdsn      |
| Ky            | Fam124b   |
| Ccna1         | Gm11827   |
| Six4          | Npas2     |
