# Supplementary figures and images for: Mitochondrial‐Targeting Antioxidant SS‐31 Suppresses Airway Inflammation and Oxidative Stress Induced by Cigarette Smoke
Source: Hindawi journal article supplement (doi:10.1155/2021/6644238), 2021-01-01

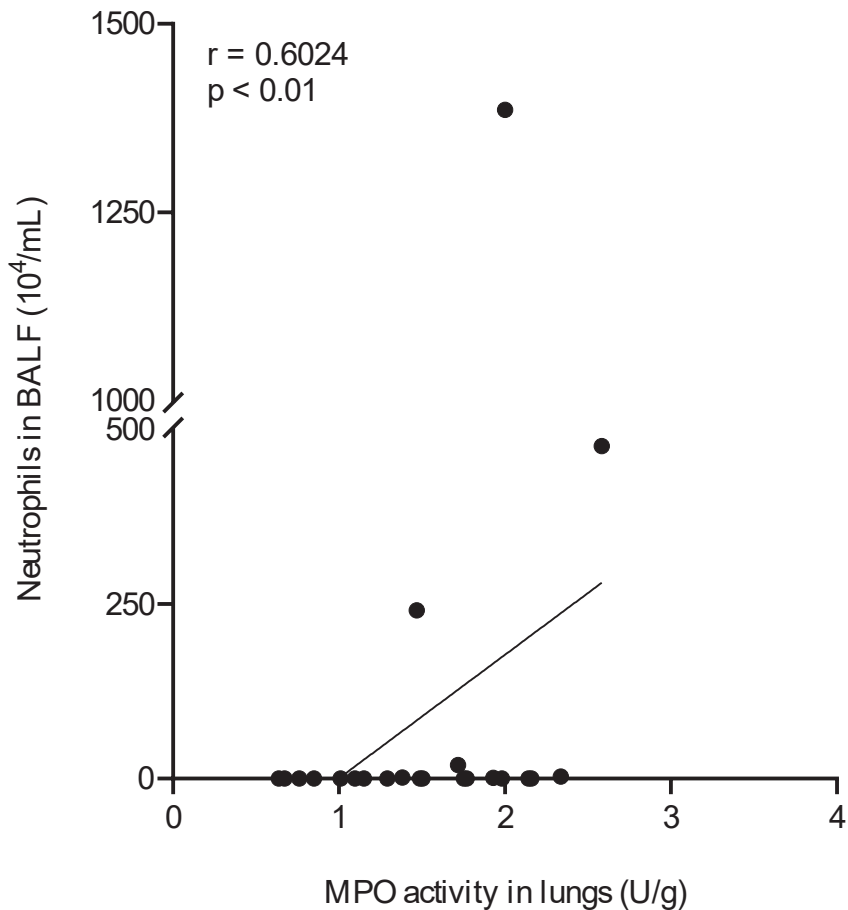

Supplement: f1 [file 6644238.f1.zip]
